# Supplementary material for: Proper ultrasound treatment increases ethanol production from simultaneous saccharification and fermentation of sugarcane bagasse
Source: Royal Society of Chemistry journal article supplement (doi:10.1039/c6ra17792a), 2016-01-01
Supplement: c6ra17792a1.pdf [file c6ra17792a1.pdf]

### Supplementary data 1 Destabilization of SCB

To analyse the actual changes in morphology of recovered solids, SEM analysis was carried out. As can be seen in Fig. S.1, the ultrasound treated biomass showed complex structure; while the enzymatic hydrolysis and ultrasound assisted enzymatic hydrolysis produced the porous biomass, which means that the unhydrolysed cellulose and lignin still exist as a solid matter. The crystallinity index for pretreated SCB, ultrasound treatment, enzymatic hydrolysis and ultrasound assisted hydrolysis were 51.6, 39.6, 32.0 and 23.9%, respectively, which clearly indicate the reduction of crystallinity of SCB. As can be seen in Fig. S.2a, the broad diffraction pattern was observed in pretreated SCB, which is due to the presence of more crystalline cellulose. Although, the ultrasound treatment (without enzyme) does not reduce the cellulose, it reduced the crystallinity markedly, which confirm the influence of ultrasound on cellulose structure. In order to understand the chemical changes in SCB after treatments, FTIR was analysed (Fig. S.2b). As can be seen in spectra, the band attributed to the presence of cellulose, hemicelluloses and lignin. The predominant band at 3321 represents the O-H stretching vibration and hydrogen bond in phenolic structure. A sharp band at 2895  $\text{cm}^{-1}$  is due to presence of C-H stretching vibration of methyl and methylene group. The absorption peak at 1732  $\text{cm}^{-1}$  represents the stretching of carbonyl groups C=O in acetyl group attached to hemicelluloses. The behavior of the spectra between 1516  $\text{cm}^{-1}$  and 1603  $\text{cm}^{-1}$  region shows the C-H bond deformation and aromatic ring vibration of lignin. Enhanced absorption spectrum at 1240  $\text{cm}^{-1}$  belongs to C-O stretching vibration in lignin and ester groups. The relative absorbance of the bands of primary and secondary OH groups at 1028  $\text{cm}^{-1}$  and 1154  $\text{cm}^{-1}$  of enzymatically hydrolysed SCB is higher than others, which indicates the presence of unhydrolysed cellulose. Moreover, the peak at 901  $\text{cm}^{-1}$  is associated with  $\beta$ -glycosidic linkage of cellulose which signifies the presence of cellulose in enzymatically treated SCB.<sup>46,47</sup>

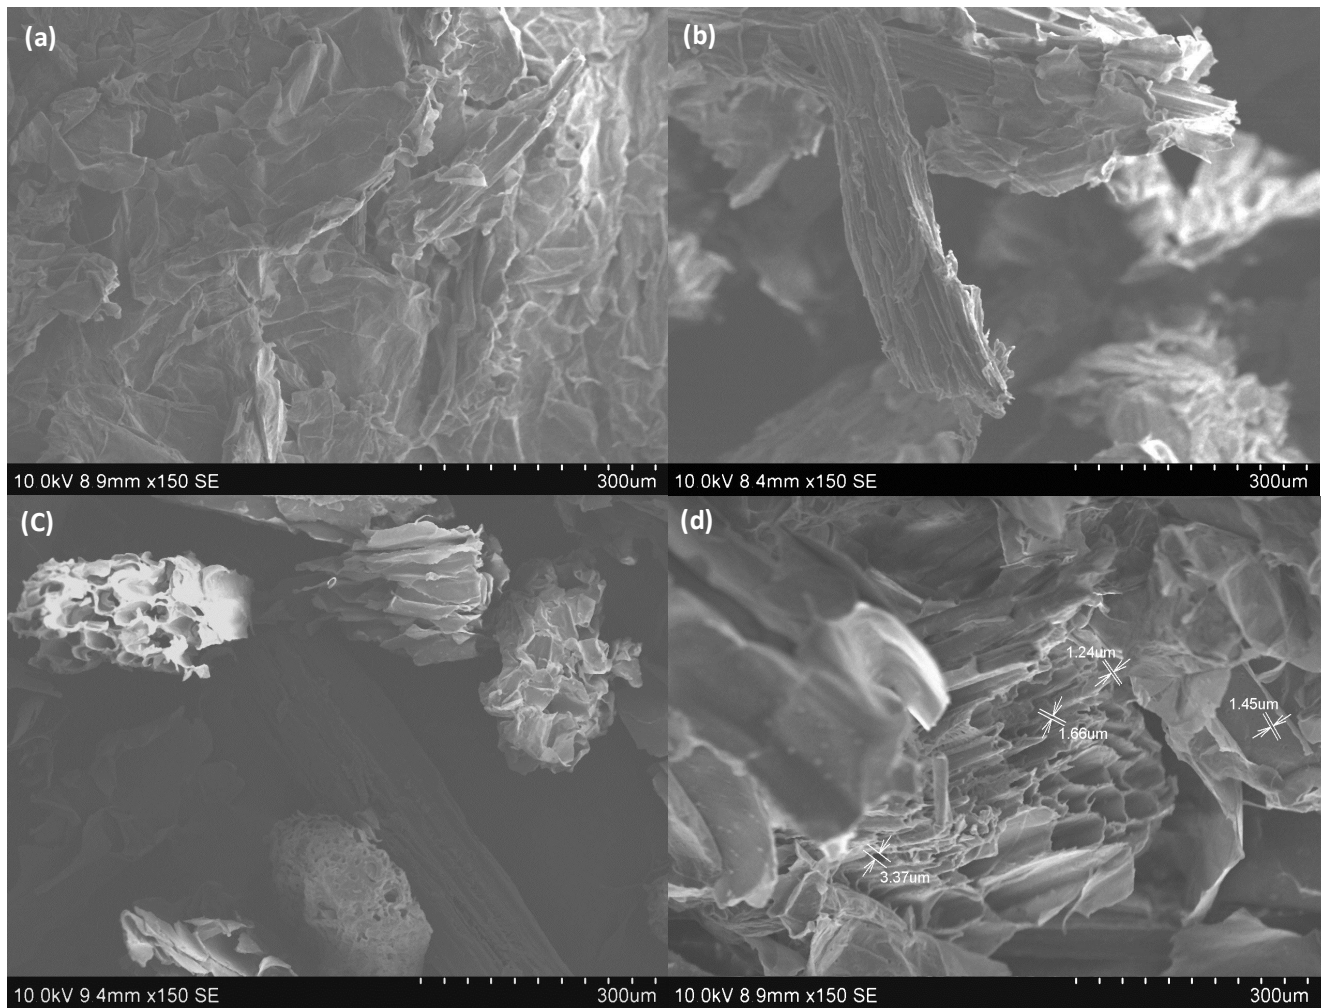

**Fig. S1** Scanning electron microscopic images of SCB (a) pretreated, (b) ultrasound treated, (c) enzymatically hydrolysed (d) ultrasound-assisted enzymatically hydrolysed.

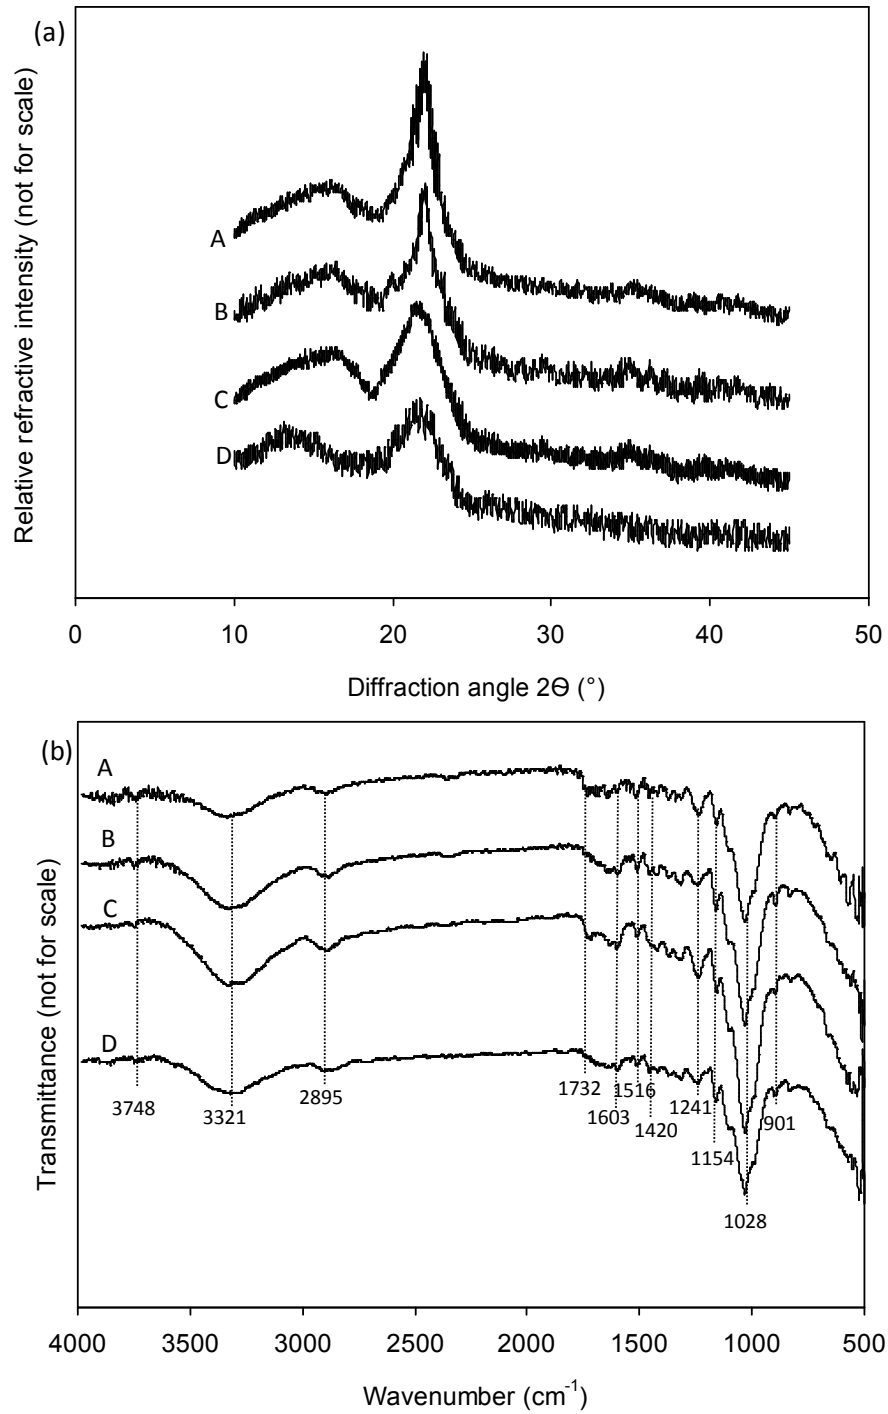

**Fig. S2** XRD pattern (a) and FTIR spectrum (b) of SCB at different conditions. A: pretreated SCB; B: ultrasound treated SCB; C: enzymatically hydrolysed SCB; D: ultrasound assisted enzymatically hydrolysed SCB.

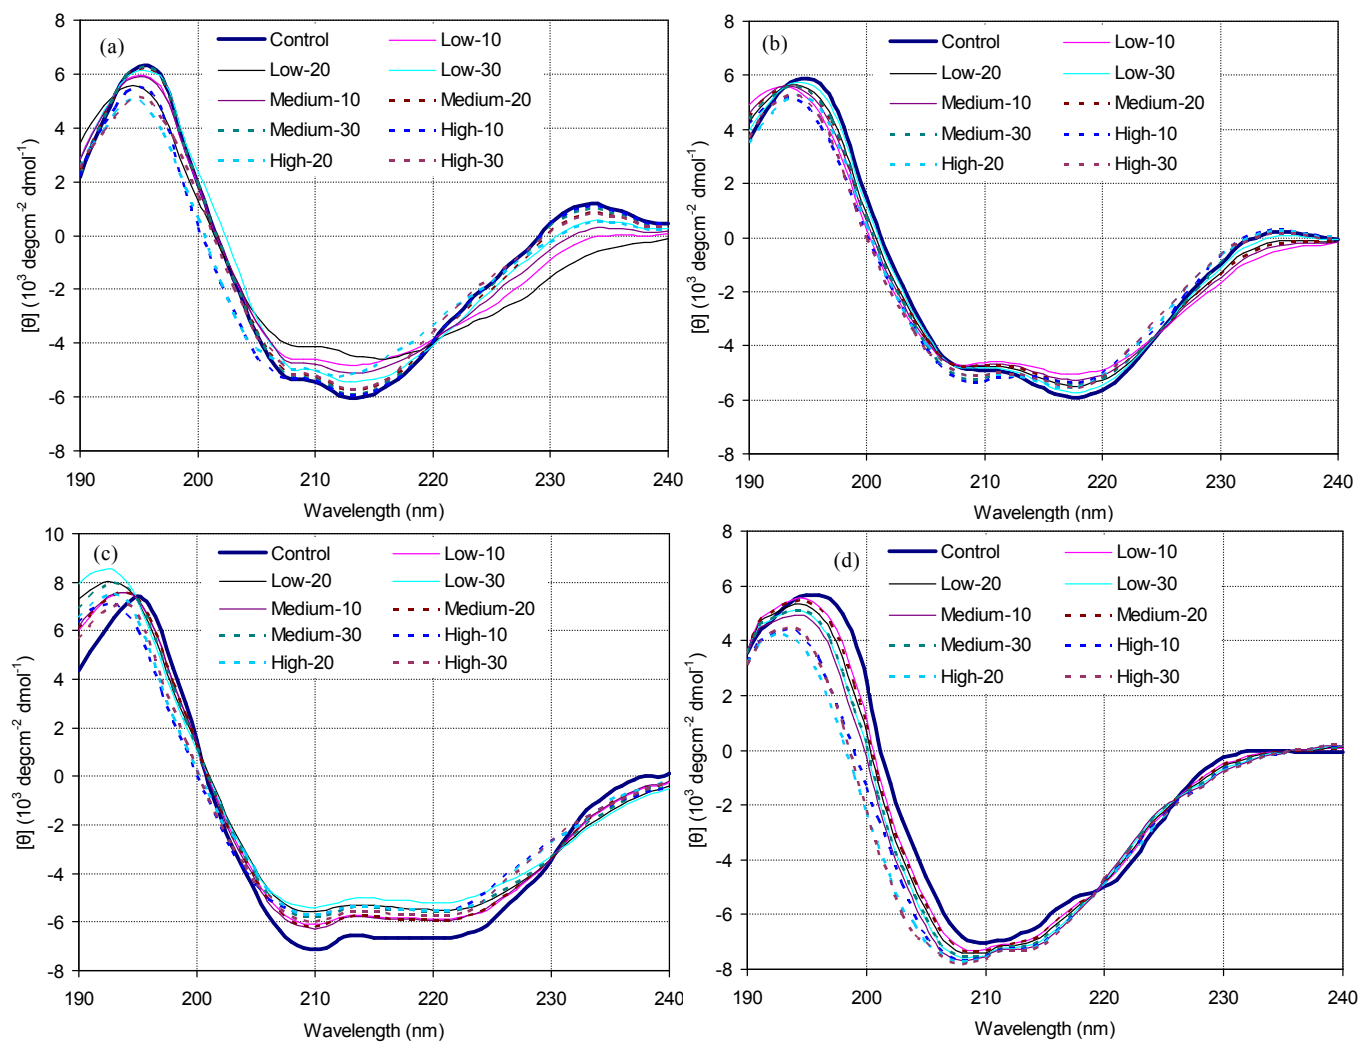

**Fig. S3** Circular dichroism spectrum of endoglucanase I (a), cellobiohydrolase I (b),  $\beta$ -glucosidase (c) and xylanase (d).

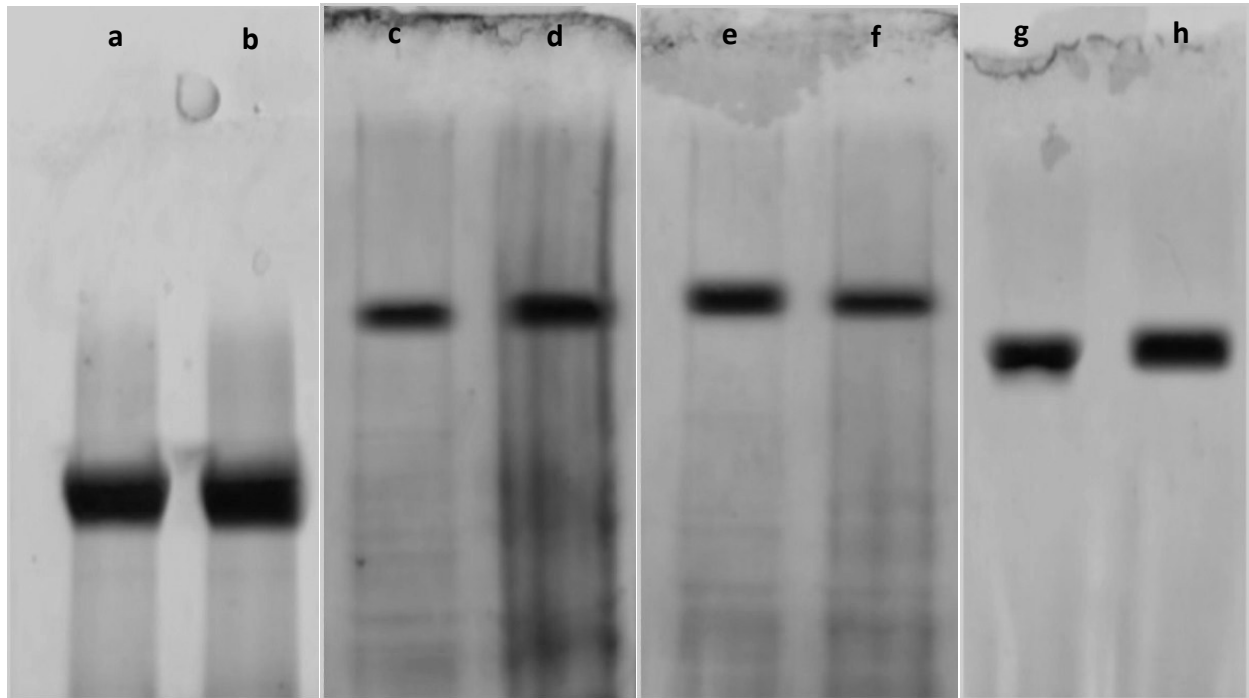

**Fig. S4** Native electrophoresis of cellulase and xylanase indicates the absence of aggregates.

Lane (a) native endoglucanase, (b) ultrasound treated endoglucanase, (c) native cellobiohydrolase, (d) ultrasound treated cellobiohydrolase, (e) native  $\beta$ -glucosidase, (f) ultrasound treated  $\beta$ -glucosidase, (g) native xylanase, (h) ultrasound treated xylanase (conditions: 60% amplitude, 30 seconds for every 30 min and total 12 h treatment).

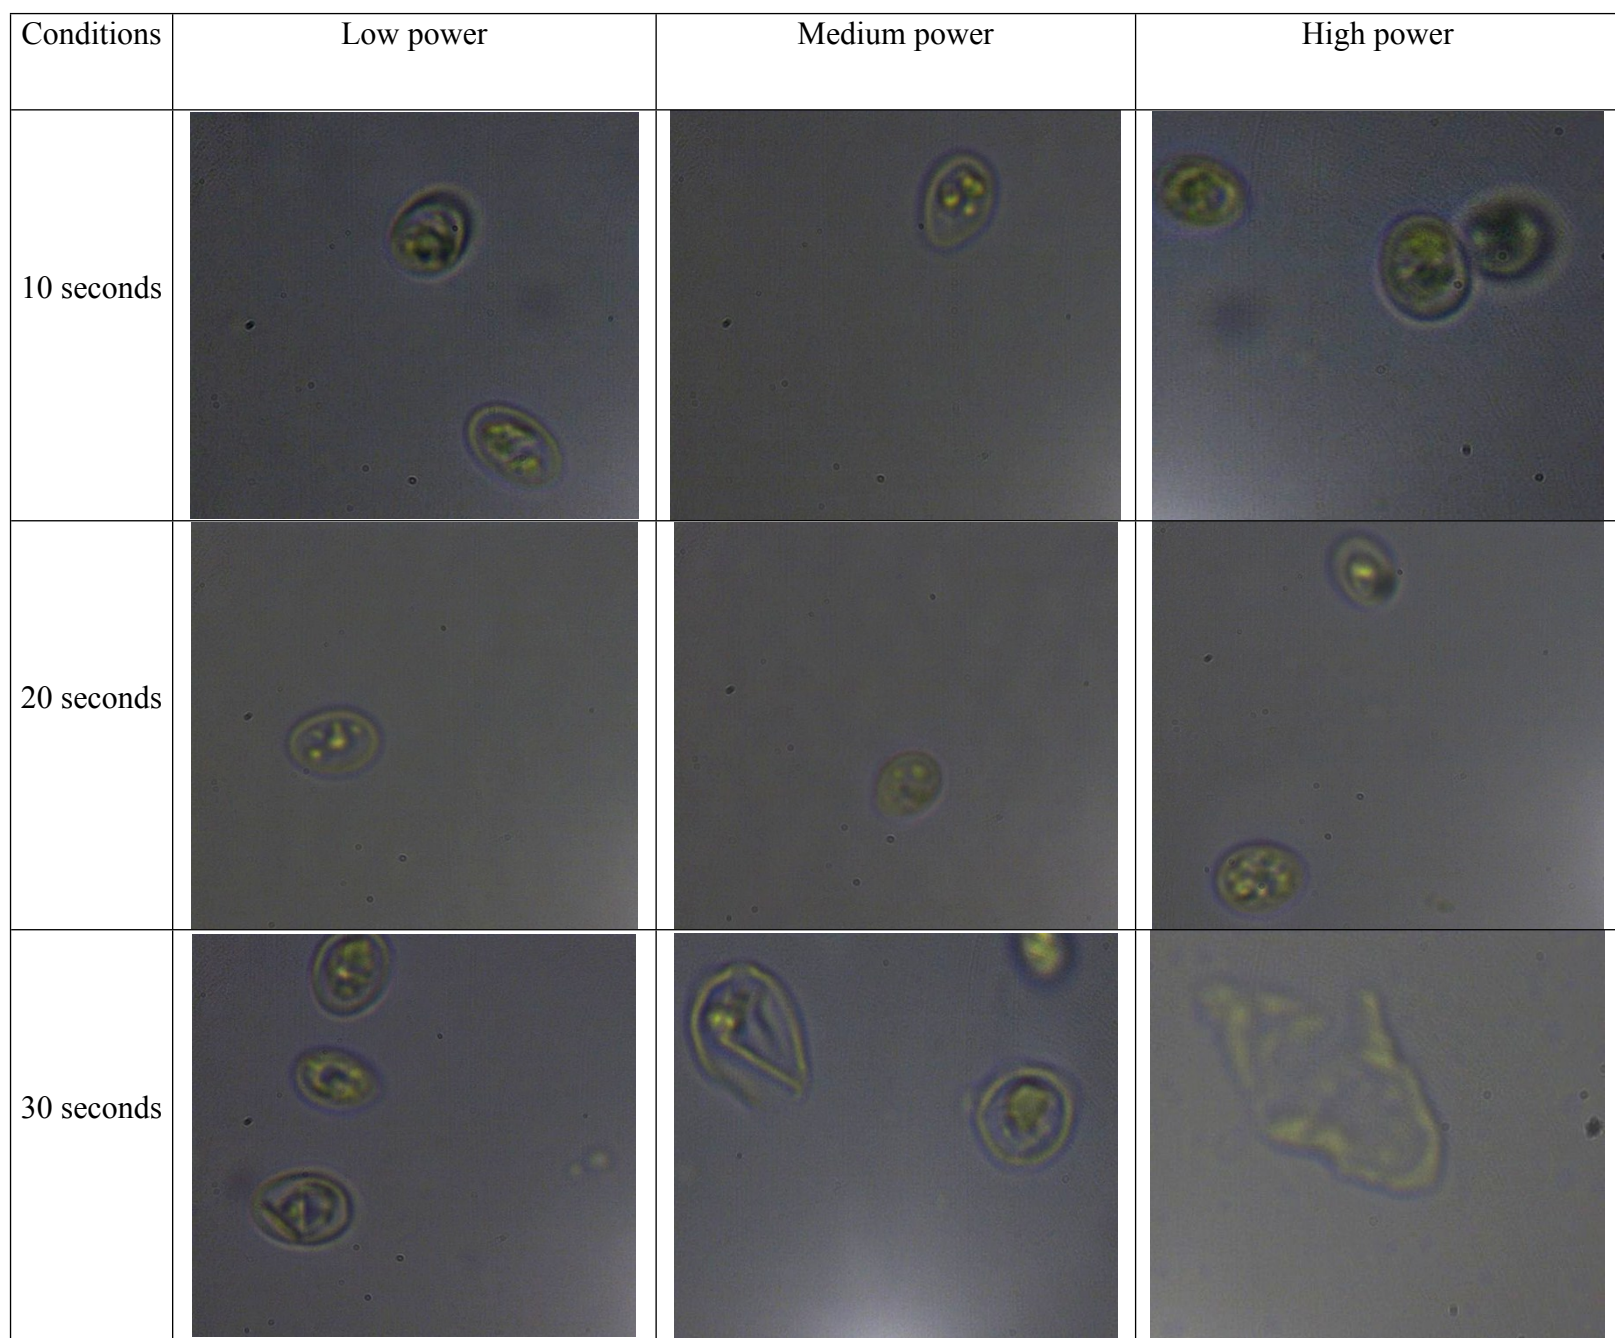

**Fig. S5** Effect of ultrasound on *S. cerevisiae* morphology during ultrasound assisted simultaneous saccharification and fermentation

**Table S1** Comparative analysis of saccharification and fermentation processes with literature review.

| raw material                | enzyme/microorganism                                                                                                 | sugar or ethanol yield     | Reference                               |
|-----------------------------|----------------------------------------------------------------------------------------------------------------------|----------------------------|-----------------------------------------|
| enzymatic hydrolysis        |                                                                                                                      |                            |                                         |
| sugarcane bagasse           | commercial enzyme (Environmental Biotechnologies, Inc) :25 FPU/g                                                     | 41-67% theoretical         | Kaar <i>et al.</i> <sup>59</sup>        |
| cotton stalks               | cellulase from <i>T.reesei</i> (celluclast 1.5L) and $\beta$ -glucosidase from <i>A.niger</i> (Novozym 188):40 FPU/g | 60.8% cellulose conversion | Silverstein <i>et al.</i> <sup>60</sup> |
| water-hyacinth              | cellulase from <i>T.reesei</i> and $\beta$ -glucosidase from <i>A.niger</i> : 12 FPU/g                               | 71% theoretical            | Aswathy <i>et al.</i> <sup>11</sup>     |
| rice straw                  | cellulase from <i>Trametes hirsuta</i> : 37.5FPU/g                                                                   | 88% saccharification       | Jeya <i>et al.</i> <sup>61</sup>        |
| micro-crystalline cellulose | cellulase from <i>T. reesei</i> (Beijing Solarbio Ltd. China): 8 mg/mL                                               | 95.48% theoretical         | Yang <i>et al.</i> <sup>35</sup>        |
| <i>Saccharum spontaneum</i> | cellulase from <i>Aspergillus oryzae</i> : 15 FPU/g                                                                  | 89.38% theoretical         | Chandel <i>et al.</i> <sup>62</sup>     |
| rice straw                  | cellulase (Genencor Spezyme CP): 20 FPU/g                                                                            | 93.1% glucose conversion   | Chen <i>et al.</i> <sup>63</sup>        |
| cassava stem                | cellulase and $\beta$ -glucosidase (Novozymes): 20 FPU/g                                                             | 70% saccharification       | Han <i>et al.</i> <sup>64</sup>         |
| sugarcane bagasse           | cellulase from <i>Aspergillus oryzae</i> P21C3 and (celluclast 1.5L, Novozyme): 10 FPU/g                             | 50.8% theoretical          | Braga <i>et al.</i> <sup>3</sup>        |
| sugarcane bagasse           | cellulase from <i>T. reesei</i>                                                                                      | sugar yield of 229 g/kg    | Gasparotto <i>et al.</i> <sup>65</sup>  |
| sugarcane bagasse           | cellulase and $\beta$ -glucosidase (Sisco Research Laboratory (SRL), India)                                          | 73.03% theoretical         | This study                              |
| sugarcane bagasse           | cellulase and $\beta$ -glucosidase from <i>T.reesei</i> : 30 FPU/g (without ultrasound)                              | 78% saccharificatoin       | This study                              |
| sugarcane bagasse           | cellulase and $\beta$ -glucosidase from <i>T.reesei</i> 30 FPU/g (with ultrasound)                                   | 92 % saccharification      | This study                              |

simultaneous saccharification and fermentation

|                                 |                                                                                                                                                       |                                                                      |                         |                                      |
|---------------------------------|-------------------------------------------------------------------------------------------------------------------------------------------------------|----------------------------------------------------------------------|-------------------------|--------------------------------------|
| sugarcane bagasse               | cellulase from <i>Penicillium chrysosporium</i> BCC4504 and <i>Aspergillus flavus</i> BCC7179                                                         | <i>P. stipitis</i>                                                   | 52.9% theoretical       | Buaban <i>et al.</i> <sup>55</sup>   |
| corn stover                     | cellulase and xylanase (Genencor): 15FPU/g                                                                                                            | Recombinant <i>Escherichia coli</i> K011 and <i>S.cerevisiae</i> D5A | 84% theoretical         | Li <i>et al.</i> <sup>66</sup>       |
| rice straw                      | commercial cellulase (celluclast 1.5L, Novozymes), xylanase (Novozymes), glycosidase (Novozyme): 12FPU/g                                              | <i>S.cerevisiae</i> NBRC 0224 and <i>P.stipitis</i> NBRC 10063       | 74% theoretical         | Park <i>et al.</i> <sup>67</sup>     |
| <i>Saccharum spontaneum</i>     | commercial cellulase (Genencor Inc.): CMCase U/g                                                                                                      | <i>S.cerevisiae</i>                                                  | 69% theoretical         | Scordia <i>et al.</i> <sup>68</sup>  |
| sugarcane bagasse               | cellulase (Spezyme-CP) and $\beta$ – glucosidase (Novozym): 10 FPU/g                                                                                  | <i>S.cerevisiae</i> ATCC 96581                                       | 18-28% theoretical      | Ewanick and Bura, <sup>69</sup>      |
| corn stover                     | cellulase from <i>T.reesei</i> (Celluclast 1.5L, Novozym) and $\beta$ –glucosidase from <i>Aspergillus niger</i> (Novozym): 10 FPU/g                  | <i>S.cervisiae</i> CET-1170                                          | 89.1% glucan conversion | Buruiana <i>et al.</i> <sup>70</sup> |
| oil palm fronds                 | cellulase from <i>T.reesei</i> (Celluclast 1.5L, Novozym) and Novozym $\beta$ – glucosidase from <i>Aspergillus niger</i> (with ultrasound): 15 FPU/g | <i>S.cerevisiae</i>                                                  | 57% theoretical         | Ofori-Boateng and Lee, <sup>21</sup> |
| <i>Parthenium hysterophorus</i> | cellulase and $\beta$ -glucosidase (50 FPU/g)                                                                                                         | <i>S. cerevisiae</i> MTCC 170                                        | 0.27 g/g biomass        | Singh <i>et al.</i> <sup>71</sup>    |
| sugarcane bagasse               | cellulase and $\beta$ -glucosidase (Sisco Research Laboratory (SRL), India)                                                                           | <i>S. cerevisiae</i>                                                 | 63.73% theoretical      | This study                           |
| sugarcane                       | Cellulase and $\beta$ -glucosidase                                                                                                                    | <i>S. cerevisiae</i>                                                 | 71% theoretical         | This study                           |



|                   |                                                                                      |                     |                 |            |
|-------------------|--------------------------------------------------------------------------------------|---------------------|-----------------|------------|
| bagasse           | from <i>T.reesei</i> (without ultrasound): 30 FPU/g                                  |                     |                 |            |
| sugarcane bagasse | Cellulase and $\beta$ -glucosidase from <i>T.reesei</i> : 30 FPU/g (with ultrasound) | <i>S.cerevisiae</i> | 90% theoretical | This study |

---
